# Supplementary material
Source: publisher figshare collection journal article supplement (https://sage.figshare.com/ndownloader/files/14001902)
Supplement: Supplementary file 1 [file 14001902]

### Supplemental material

Table 1 - Reported frequency of outcomes by stakeholder.

| Theme/outcomes                                                    | Total,<br>n (%) | Patients,<br>n (%) | Informal<br>carers, n (%) | Health professionals, n (%) |
|-------------------------------------------------------------------|-----------------|--------------------|---------------------------|-----------------------------|
| Theme: being healthy                                              |                 |                    |                           |                             |
| <u>Positive outcomes</u>                                          |                 |                    |                           |                             |
| Improving exercise tolerance                                      | 16 (48%)        | 6 (50%)            | 2 (18%)                   | 8 (80%)                     |
| Increasing muscular strength                                      | 6 (18%)         | 2 (17%)            | 0 (0%)                    | 4 (40%)                     |
| Achieving a healthy weight                                        | 5 (15%)         | 0 (0%)             | 1 (9%)                    | 4 (40%)                     |
| Increasing or maintaining levels of physical activity             | 12 (36%)        | 5 (42%)            | 3 (27%)                   | 4 (40%)                     |
| Improving balance                                                 | 6 (18%)         | 3 (25%)            | 0 (0%)                    | 3 (30)                      |
| Improving functional performance                                  | 22 (67%)        | 8 (67%)            | 4 (36%)                   | 10 (100%)                   |
| Improving mobility and agility                                    | 6 (18%)         | 3 (25%)            | 0 (0%)                    | 3 (30%)                     |
| Reducing pulmonary function decline                               | 6 (18%)         | 0 (0%)             | 0 (0%)                    | 2 (20%)                     |
| Improving body awareness                                          | 1 (3%)          | 0 (0%)             | 0 (0%)                    | 1 (10%)                     |
| Improving health-related quality of life                          | 7 (21%)         | 0 (0%)             | 1 (9%)                    | 6 (60%)                     |
| Improving well-being                                              | 7 (21%)         | 3 (25%)            | 3 (27%)                   | 0 (0%)                      |
| Managing fatigue, improving stamina and exercise recovery         | 16 (48%)        | 5 (42%)            | 5 (45%)                   | 5 (50%)                     |
| Reducing anxiety and fear                                         | 15 (45%)        | 6 (50%)            | 0 (0%)                    | 9 (90%)                     |
| Reducing depression                                               | 5 (15%)         | 0 (0%)             | 0 (0%)                    | 5 (50%)                     |
| Reducing and taking control over dyspnoea                         | 21 (64%)        | 10 (83%)           | 5 (45%)                   | 6 (60%)                     |
| Improving bronchial hygiene and cough                             | 4 (12%)         | 2 (17%)            | 0 (0%)                    | 2 (20%)                     |
| Improving the quality of sleep                                    | 3 (9%)          | 1 (8%)             | 2 (18%)                   | 0 (0%)                      |
| Reducing the impact on comorbidities                              | 9 (27%)         | 3 (25%)            | 0 (0%)                    | 4 (40%)                     |
| Maintaining good blood pressure, heart rate and peripheral oxygen | 5 (15%)         | 2 (17%)            | 0 (0%)                    | 3 (30%)                     |
| Maintaining a balanced nutrition                                  | 5 (15%)         | 1 (8%)             | 0 (0%)                    | 4 (40%)                     |
| <u>Negative outcomes</u>                                          |                 |                    |                           |                             |
| Increasing fatigue                                                | 1 (3%)          | 0 (0%)             | 1 (9%)                    | 0 (0%)                      |
| Increasing pain                                                   | 8 (24%)         | 5 (42%)            | 0 (0%)                    | 3 (30%)                     |
| Increasing the impact on comorbidities                            | 2 (6%)          | 0 (0%)             | 0 (0%)                    | 2 (20%)                     |
| Theme: I can('t) do it                                            |                 |                    |                           |                             |

|                                                                |          |         |         |          |
|----------------------------------------------------------------|----------|---------|---------|----------|
| <u>Positive outcomes</u>                                       |          |         |         |          |
| Improving mood                                                 | 10 (30%) | 3 (25%) | 3 (27%) | 4 (40%)  |
| Staying motivated and feeling confident                        | 18 (55%) | 8 (67%) | 4 (36%) | 6 (60%)  |
| Managing expectations                                          | 7 (21%)  | 1 (8%)  | 1 (9%)  | 5 (50%)  |
| Improving coping skills                                        | 5 (15%)  | 4 (33%) | 0 (0%)  | 1 (10%)  |
| Getting enjoyment and pleasure                                 | 9 (27%)  | 7 (58%) | 1 (9%)  | 1 (10%)  |
| Theme: feeling fulfilled                                       |          |         |         |          |
| <u>Positive outcomes</u>                                       |          |         |         |          |
| Being more sociable                                            | 13 (39%) | 5 (42%) | 2 (18%) | 6 (60%)  |
| Improving predisposition for hobbies                           | 6 (18%)  | 4 (33%) | 2 (18%) | 0 (0%)   |
| Having meaningful support                                      | 18 (55%) | 7 (58%) | 3 (27%) | 8 (80%)  |
| Having a purpose, feeling of self-efficacy                     | 18 (55%) | 2 (17%) | 2 (18%) | 2 (20%)  |
| Keeping an active sexual life                                  | 2 (6%)   | 0 (0%)  | 0 (0%)  | 2 (20%)+ |
| Feeling independent                                            | 5 (15%)  | 2 (17%) | 0 (0%)  | 3 (30%)  |
| Reducing social embarrassment and frustration                  | 8 (24%)  | 2 (17%) | 0 (0%)  | 3 (30%)  |
| <u>Negative outcomes</u>                                       |          |         |         |          |
| Increasing social embarrassment and frustration                | 3 (9%)   | 0 (0%)  | 0 (0%)  | 3 (30%)  |
| Theme: knowing more, doing better                              |          |         |         |          |
| <u>Positive outcomes</u>                                       |          |         |         |          |
| Learning about the disease, its management and support network | 9 (27%)  | 3 (25%) | 0 (0%)  | 6 (60%)  |
| Demystifying beliefs and reducing catastrophizing              | 5 (15%)  | 1 (8%)  | 0 (0%)  | 4 (40%)  |
| Managing burden of disease and care                            | 9 (27%)  | 1 (8%)  | 5 (45%) | 4 (40%)  |
| Theme: a shift in health care and expenses                     |          |         |         |          |
| <u>Positive outcomes</u>                                       |          |         |         |          |
| Reducing use of medication and oxygen                          | 9 (27%)  | 3 (25%) | 1 (9%)  | 5 (50%)  |
| Avoiding exacerbations                                         | 14 (42%) | 5 (42%) | 3 (27%) | 6 (60%)  |
| Reducing healthcare utilization                                | 3 (9%)   | 0 (0%)  | 0 (0%)  | 3 (30%)  |
| <u>Negative outcomes</u>                                       |          |         |         |          |
| Increasing costs with PR                                       | 9 (27%)  | 5 (42%) | 1 (9%)  | 3 (30%)  |
| Having the program far from home                               | 8 (24%)  | 2 (17%) | 2 (18%) | 4 (40%)  |
